# Supplementary material
Source: PubMed Central journal article supplement (PMC2538616)
Supplement: NIHMS58149-supplement.pdf [file NIHMS58149-supplement.pdf]

# Supporting Information

## **The Binding Orientation of a Norindenoisoquinoline in the Topoisomerase I-DNA Cleavage Complex is Governed by $\pi$ - $\pi$ Stacking Interactions**

*Yunlong Song and Mark Cushman\**

Department of Medicinal Chemistry and Molecular Pharmacology, School of Pharmacy and  
Pharmaceutical Sciences, and the Purdue Cancer Center,  
Purdue University, West Lafayette, Indiana 47907  
E-mail: [cushman@pharmacy.purdue.edu](mailto:cushman@pharmacy.purdue.edu)

## Model A (Crystal structure)

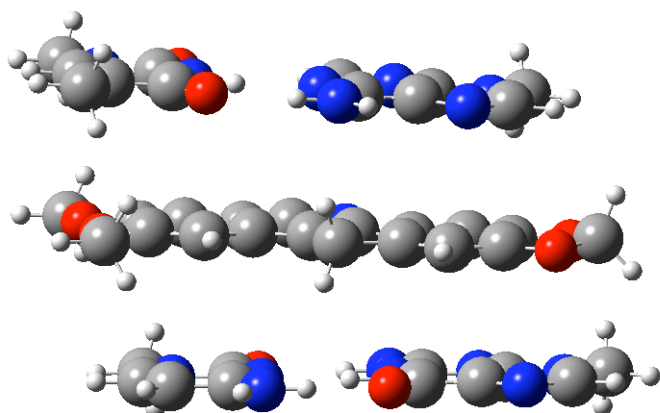

| Element | X           | Y           | Z           |
|---------|-------------|-------------|-------------|
| C       | 0.00000000  | 0.00000000  | 0.00000000  |
| C       | 1.42585310  | 0.00000000  | 0.00000000  |
| C       | 2.10745469  | 1.22726530  | 0.00000000  |
| C       | 1.36322937  | 2.44448399  | -0.00018611 |
| C       | 0.01114868  | 2.43011260  | -0.00036225 |
| C       | -0.68966535 | 1.16806725  | -0.00026547 |
| C       | 3.52138916  | 1.21780043  | 0.00014952  |
| N       | 4.25120675  | 0.14277737  | 0.00015558  |
| C       | 3.58929035  | -1.02313955 | 0.00000780  |
| C       | 2.22458666  | -1.15677221 | 0.00016873  |
| C       | 1.84248448  | -2.61825285 | 0.00022484  |
| C       | 3.19515378  | -3.30225777 | -0.00015368 |
| C       | 4.20936858  | -2.35513324 | -0.00051657 |
| C       | 5.56262229  | -2.70596076 | 0.00124230  |
| C       | 5.81436781  | -4.04837572 | 0.00414130  |
| C       | 4.80543611  | -4.99823503 | 0.00506088  |
| C       | 3.47673739  | -4.66848096 | 0.00265979  |
| O       | 5.36393295  | -6.23637948 | -0.00872523 |
| C       | 6.74571204  | -6.04988120 | 0.18681436  |
| O       | 7.01638035  | -4.68506936 | -0.01220721 |
| O       | -2.02186246 | 1.27824563  | -0.00035999 |
| C       | -2.81230967 | 0.12255291  | -0.00059727 |
| O       | -0.78744076 | 3.50974944  | -0.00054547 |
| C       | -0.21072456 | 4.78378298  | -0.00177816 |
| H       | -0.51661817 | -0.93922779 | 0.00003645  |
| H       | 1.90272620  | 3.37226035  | -0.00018294 |
| H       | 4.04678790  | 2.15977620  | 0.00014976  |
| H       | 1.25664169  | -2.88765521 | -0.87585116 |
| H       | 1.25696117  | -2.88740898 | 0.87658034  |
| H       | 6.34297893  | -1.96945024 | -0.00157984 |
| H       | 2.71146666  | -5.42273263 | 0.00115562  |
| H       | 7.29622554  | -6.63890862 | -0.53140043 |
| H       | 7.01051353  | -6.33178751 | 1.20106756  |
| H       | -3.83770706 | 0.46059830  | -0.00078766 |
| H       | -2.63295618 | -0.47852550 | 0.88514486  |
| H       | -2.63253622 | -0.47854477 | -0.88628723 |
| H       | -1.03062357 | 5.48639111  | -0.00229662 |
| H       | 0.39721072  | 4.94265958  | -0.88750367 |
| H       | 0.39742460  | 4.94442633  | 0.88361156  |

|   |             |             |             |
|---|-------------|-------------|-------------|
| H | 0.30233285  | 5.38308447  | 4.42355442  |
| H | 8.47412630  | -0.82540399 | 3.89246878  |
| H | -1.25683852 | 5.44469473  | 3.60015430  |
| H | 0.24256269  | 5.45063504  | 2.67056789  |
| H | 8.41062746  | -0.76069517 | 2.13459489  |
| H | 8.87809915  | -2.25625716 | 2.94383697  |
| C | -0.24819601 | 5.06021085  | 3.55098072  |
| N | -0.30558045 | 3.60532080  | 3.49656798  |
| C | 0.88983737  | 2.93358557  | 3.42584761  |
| O | 1.94326542  | 3.50632832  | 3.40845751  |
| N | 0.78875005  | 1.57136412  | 3.37717497  |
| C | -0.36300148 | 0.82580076  | 3.39224567  |
| O | -0.32361861 | -0.37810425 | 3.34456034  |
| C | -1.60559759 | 1.59656377  | 3.46881736  |
| C | -2.90903938 | 0.84944364  | 3.48967252  |
| C | -1.50077584 | 2.92374077  | 3.51580462  |
| C | 8.23631889  | -1.38739903 | 2.99909416  |
| N | 6.85872087  | -1.82778187 | 3.03266174  |
| C | 6.38337257  | -3.11298159 | 3.00276889  |
| N | 5.10563473  | -3.20182213 | 3.04575056  |
| C | 4.68388556  | -1.88954411 | 3.10896884  |
| C | 3.41185774  | -1.29929053 | 3.17656256  |
| N | 2.28516497  | -2.01027447 | 3.19145651  |
| N | 3.35145875  | 0.03192021  | 3.22739914  |
| C | 4.48085205  | 0.73892615  | 3.21252385  |
| N | 5.71302069  | 0.29966178  | 3.15182602  |
| C | 5.75808103  | -1.03126704 | 3.10161119  |
| H | 1.66577200  | 1.06683077  | 3.32512356  |
| H | -3.02109093 | 0.24429232  | 2.59681310  |
| H | -3.74657190 | 1.53569756  | 3.54755834  |
| H | -2.95519811 | 0.17761013  | 4.33951863  |
| H | -2.37182383 | 3.54895375  | 3.57274056  |
| H | 7.05680188  | -3.94553419 | 2.94805562  |
| H | 2.33604004  | -2.99989125 | 3.15297581  |
| H | 1.39804809  | -1.55369136 | 3.24004840  |
| H | 4.34631365  | 1.80542982  | 3.25635769  |
| H | 1.73983969  | 3.94416640  | -2.70485218 |
| H | 9.00809661  | -3.54341549 | -2.28167776 |
| H | 0.23978604  | 4.17178420  | -3.60914513 |
| H | 1.76186591  | 3.88360513  | -4.45759268 |
| H | 9.02309144  | -3.47977614 | -4.04045718 |
| H | 9.18000148  | -5.02924334 | -3.21501782 |
| N | 0.91300069  | 2.20983452  | -3.53277543 |
| C | -0.34690595 | 1.71523944  | -3.53187117 |
| C | 2.00613111  | 1.34612617  | -3.48910099 |
| O | 3.11727635  | 1.82946484  | -3.49149777 |
| N | 1.77771100  | 0.01749050  | -3.44605670 |
| C | 0.55611470  | -0.46505230 | -3.44481457 |
| N | 0.39568556  | -1.77855420 | -3.40151199 |
| C | -0.59441889 | 0.40064442  | -3.48947832 |
| C | 1.18164363  | 3.64146836  | -3.57899174 |
| C | 8.70395452  | -4.05856091 | -3.18400577 |
| N | 7.27109675  | -4.24433537 | -3.20888949 |
| C | 6.57211426  | -5.43047490 | -3.17298659 |
| N | 5.30401679  | -5.27866012 | -3.19848306 |
| C | 5.12307951  | -3.91250213 | -3.25360936 |
| C | 3.93912304  | -3.11820971 | -3.30295905 |
| O | 2.77990725  | -3.46665671 | -3.30766940 |
| N | 4.25048954  | -1.75883126 | -3.35040944 |
| C | 5.50337051  | -1.22798847 | -3.35110459 |
| N | 5.58196112  | 0.10513341  | -3.40209266 |
| N | 6.58955650  | -1.94581665 | -3.30609582 |

|   |             |             |             |
|---|-------------|-------------|-------------|
| C | 6.33565633  | -3.26750376 | -3.25969150 |
| H | -1.13835295 | 2.44010672  | -3.56691271 |
| H | 1.19731030  | -2.38698173 | -3.36913124 |
| H | -0.51227463 | -2.17607641 | -3.39851190 |
| H | -1.59423389 | 0.01503463  | -3.48884967 |
| H | 7.08662894  | -6.36980066 | -3.12945996 |
| H | 3.45903488  | -1.13618803 | -3.38640567 |
| H | 6.48951715  | 0.50323087  | -3.39916980 |
| H | 4.77443283  | 0.69548167  | -3.43200176 |

### Model B (NORIND\_R90)

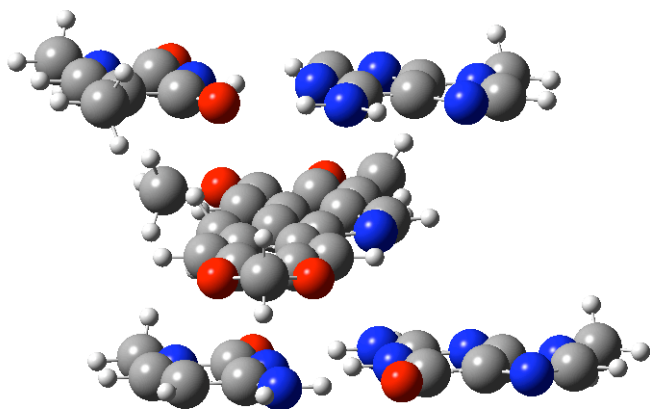

| Element | X           | Y           | Z           |
|---------|-------------|-------------|-------------|
| C       | 0.00000000  | 0.00000000  | 0.00000000  |
| C       | 1.42585310  | 0.00000000  | 0.00000000  |
| C       | 2.10745469  | 1.22726530  | 0.00000000  |
| C       | 1.36322937  | 2.44448399  | -0.00018611 |
| C       | 0.01114868  | 2.43011260  | -0.00036225 |
| C       | -0.68966535 | 1.16806725  | -0.00026547 |
| C       | 3.52138916  | 1.21780043  | 0.00014952  |
| N       | 4.25120675  | 0.14277737  | 0.00015558  |
| C       | 3.58929035  | -1.02313955 | 0.00000780  |
| C       | 2.22458666  | -1.15677221 | 0.00016873  |
| C       | 1.84248448  | -2.61825285 | 0.00022484  |
| C       | 3.19515378  | -3.30225777 | -0.00015368 |
| C       | 4.20936858  | -2.35513324 | -0.00051657 |
| C       | 5.56262229  | -2.70596076 | 0.00124230  |
| C       | 5.81436781  | -4.04837572 | 0.00414130  |
| C       | 4.80543611  | -4.99823503 | 0.00506088  |
| C       | 3.47673739  | -4.66848096 | 0.00265979  |
| O       | 5.36393295  | -6.23637948 | -0.00872523 |
| C       | 6.74571204  | -6.04988120 | 0.18681436  |
| O       | 7.01638035  | -4.68506936 | -0.01220721 |
| O       | -2.02186246 | 1.27824563  | -0.00035999 |
| C       | -2.81230967 | 0.12255291  | -0.00059727 |
| O       | -0.78744076 | 3.50974944  | -0.00054547 |
| C       | -0.21072456 | 4.78378298  | -0.00177816 |
| H       | -0.51661817 | -0.93922779 | 0.00003645  |
| H       | 1.90272620  | 3.37226035  | -0.00018294 |
| H       | 4.04678790  | 2.15977620  | 0.00014976  |
| H       | 1.25664169  | -2.88765521 | -0.87585116 |
| H       | 1.25696117  | -2.88740898 | 0.87658034  |
| H       | 6.34297893  | -1.96945024 | -0.00157984 |

|   |             |             |             |
|---|-------------|-------------|-------------|
| H | 2.71146666  | -5.42273263 | 0.00115562  |
| H | 7.29622554  | -6.63890862 | -0.53140043 |
| H | 7.01051353  | -6.33178751 | 1.20106756  |
| H | -3.83770706 | 0.46059830  | -0.00078766 |
| H | -2.63295618 | -0.47852550 | 0.88514486  |
| H | -2.63253622 | -0.47854477 | -0.88628723 |
| H | -1.03062357 | 5.48639111  | -0.00229662 |
| H | 0.39721072  | 4.94265958  | -0.88750367 |
| H | 0.39742460  | 4.94442633  | 0.88361156  |
| H | -3.15652888 | -2.74652728 | 4.49886968  |
| H | 3.04852136  | 5.41494078  | 3.79542707  |
| H | -3.22351072 | -4.31879324 | 3.70119048  |
| H | -3.23544027 | -2.83460913 | 2.74755249  |
| H | 2.97244528  | 5.32299635  | 2.03926688  |
| H | 4.47321093  | 5.80333239  | 2.83114050  |
| C | -2.83932996 | -3.31112636 | 3.63323293  |
| N | -1.38482445 | -3.36956909 | 3.57032866  |
| C | -0.71353363 | -2.17553631 | 3.47594796  |
| O | -1.28635237 | -1.12245344 | 3.44524779  |
| N | 0.64834139  | -2.27757156 | 3.42008964  |
| C | 1.39395978  | -3.42902471 | 3.44893989  |
| O | 2.59753138  | -3.39057188 | 3.39282450  |
| C | 0.62368008  | -4.67012237 | 3.55057511  |
| C | 1.37088912  | -5.97315268 | 3.58765025  |
| C | -0.70316207 | -4.56438489 | 3.60446089  |
| C | 3.60471321  | 5.16264240  | 2.90239869  |
| N | 4.04527184  | 3.78571244  | 2.95542798  |
| C | 5.33024048  | 3.30977799  | 2.92493372  |
| N | 5.41932732  | 2.03289254  | 2.98802996  |
| C | 4.10747553  | 1.61239041  | 3.06654965  |
| C | 3.51764164  | 0.34169970  | 3.15855008  |
| N | 4.22868085  | -0.78469498 | 3.18709610  |
| N | 2.18678587  | 0.28230224  | 3.21895960  |
| C | 1.47972476  | 1.41139687  | 3.19036279  |
| N | 1.91861624  | 2.64236463  | 3.10687850  |
| C | 3.24919376  | 2.68643557  | 3.04734089  |
| H | 1.15254737  | -1.40156996 | 3.35060387  |
| H | 1.97023863  | -6.09969572 | 2.69281583  |
| H | 0.68500513  | -6.80955244 | 3.66350885  |
| H | 2.04821517  | -6.00565803 | 4.43376025  |
| H | -1.32801335 | -5.43431892 | 3.67951585  |
| H | 6.16243768  | 3.98212634  | 2.85394137  |
| H | 5.21802943  | -0.73457638 | 3.14140225  |
| H | 3.77240076  | -1.67085009 | 3.25299949  |
| H | 0.41352356  | 1.27772246  | 3.24326089  |
| H | -1.76381895 | -1.42459554 | -2.66100417 |
| H | 5.72657128  | 5.84851436  | -2.40400291 |
| H | -1.99731419 | -2.93902915 | -3.53945022 |
| H | -1.71462646 | -1.43090959 | -4.41422757 |
| H | 5.65156608  | 5.83502970  | -4.16234652 |
| H | 7.20633962  | 6.00509003  | -3.34958689 |
| N | -0.03479686 | -2.26485207 | -3.48688038 |
| C | 0.45976358  | -3.52464335 | -3.46883096 |
| C | 0.82920150  | -1.17126978 | -3.46642890 |
| O | 0.34588405  | -0.06024606 | -3.48364209 |
| N | 2.15808179  | -1.39913558 | -3.42827577 |
| C | 2.64059330  | -2.62061450 | -3.41042914 |
| N | 3.95434343  | -2.78049208 | -3.37301756 |
| C | 1.77459885  | -3.77160820 | -3.43093042 |
| C | -1.46669268 | -1.99680669 | -3.52818980 |
| C | 6.23586687  | 5.52973193  | -3.30459651 |
| N | 6.42144337  | 4.09663534  | -3.30746929 |

|   |             |             |             |
|---|-------------|-------------|-------------|
| C | 7.60777395  | 3.39817435  | -3.26791553 |
| N | 7.45576813  | 2.12984969  | -3.27188802 |
| C | 6.08927818  | 1.94821802  | -3.31524712 |
| C | 5.29465591  | 0.76371915  | -3.34028026 |
| O | 5.64303830  | -0.39546543 | -3.32846605 |
| N | 3.93500640  | 1.07445013  | -3.38398214 |
| C | 3.40419927  | 2.32722338  | -3.40153944 |
| N | 2.07077751  | 2.40514834  | -3.44517793 |
| N | 4.12232857  | 3.41390406  | -3.37876887 |
| C | 5.44428210  | 3.16061975  | -3.33680011 |
| H | -0.26533368 | -4.31645998 | -3.48641604 |
| H | 4.56298644  | -1.97852707 | -3.35750594 |
| H | 4.35185497  | -3.68833649 | -3.35792713 |
| H | 2.16018072  | -4.77133220 | -3.41665159 |
| H | 8.54737335  | 3.91320638  | -3.23879899 |
| H | 3.31212515  | 0.28259591  | -3.40313033 |
| H | 1.67272831  | 3.31268357  | -3.45438244 |
| H | 1.48022953  | 1.59731707  | -3.45818825 |

Model C (NORIND\_R180)

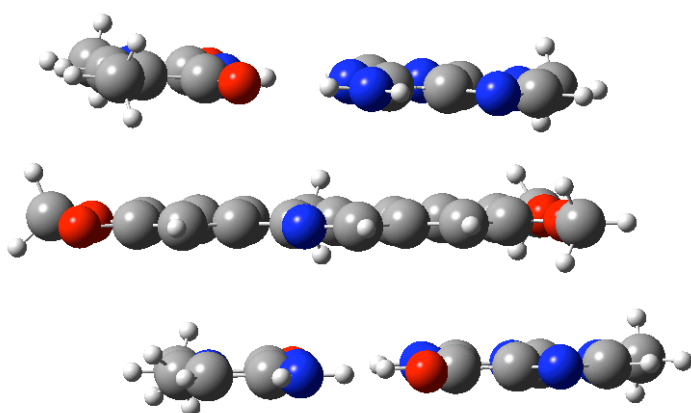

| Element | X           | Y           | Z           |
|---------|-------------|-------------|-------------|
| C       | 0.00000000  | 0.00000000  | 0.00000000  |
| C       | 1.42585310  | 0.00000000  | 0.00000000  |
| C       | 2.10745469  | 1.22726530  | 0.00000000  |
| C       | 1.36322937  | 2.44448399  | -0.00018611 |
| C       | 0.01114868  | 2.43011260  | -0.00036225 |
| C       | -0.68966535 | 1.16806725  | -0.00026547 |
| C       | 3.52138916  | 1.21780043  | 0.00014952  |
| N       | 4.25120675  | 0.14277737  | 0.00015558  |
| C       | 3.58929035  | -1.02313955 | 0.00000780  |
| C       | 2.22458666  | -1.15677221 | 0.00016873  |
| C       | 1.84248448  | -2.61825285 | 0.00022484  |
| C       | 3.19515378  | -3.30225777 | -0.00015368 |
| C       | 4.20936858  | -2.35513324 | -0.00051657 |
| C       | 5.56262229  | -2.70596076 | 0.00124230  |
| C       | 5.81436781  | -4.04837572 | 0.00414130  |
| C       | 4.80543611  | -4.99823503 | 0.00506088  |
| C       | 3.47673739  | -4.66848096 | 0.00265979  |
| O       | 5.36393295  | -6.23637948 | -0.00872523 |
| C       | 6.74571204  | -6.04988120 | 0.18681436  |
| O       | 7.01638035  | -4.68506936 | -0.01220721 |
| O       | -2.02186246 | 1.27824563  | -0.00035999 |
| C       | -2.81230967 | 0.12255291  | -0.00059727 |

|   |             |             |             |
|---|-------------|-------------|-------------|
| O | -0.78744076 | 3.50974944  | -0.00054547 |
| C | -0.21072456 | 4.78378298  | -0.00177816 |
| H | -0.51661817 | -0.93922779 | 0.00003645  |
| H | 1.90272620  | 3.37226035  | -0.00018294 |
| H | 4.04678790  | 2.15977620  | 0.00014976  |
| H | 1.25664169  | -2.88765521 | -0.87585116 |
| H | 1.25696117  | -2.88740898 | 0.87658034  |
| H | 6.34297893  | -1.96945024 | -0.00157984 |
| H | 2.71146666  | -5.42273263 | 0.00115562  |
| H | 7.29622554  | -6.63890862 | -0.53140043 |
| H | 7.01051353  | -6.33178751 | 1.20106756  |
| H | -3.83770706 | 0.46059830  | -0.00078766 |
| H | -2.63295618 | -0.47852550 | 0.88514486  |
| H | -2.63253622 | -0.47854477 | -0.88628723 |
| H | -1.03062357 | 5.48639111  | -0.00229662 |
| H | 0.39721072  | 4.94265958  | -0.88750367 |
| H | 0.39742460  | 4.94442633  | 0.88361156  |
| H | 4.97318962  | -6.20485164 | 4.57726192  |
| H | -3.19239095 | -0.01084380 | 3.82666436  |
| H | 6.54027410  | -6.28490110 | 3.77064105  |
| H | 5.04996712  | -6.31203117 | 2.82691480  |
| H | -3.11183164 | -0.11530119 | 2.07140404  |
| H | -3.58697615 | 1.39813558  | 2.84202394  |
| C | 5.53219891  | -5.90173817 | 3.70299360  |
| N | 5.59026936  | -4.44844494 | 3.61624463  |
| C | 4.39566851  | -3.77861197 | 3.51874609  |
| O | 3.34239575  | -4.35171670 | 3.50409031  |
| N | 4.49737383  | -2.41782902 | 3.44025593  |
| C | 5.64900702  | -1.67198962 | 3.44963829  |
| O | 5.61022174  | -0.46947561 | 3.37435262  |
| C | 6.89071621  | -2.44068751 | 3.55568440  |
| C | 8.19397653  | -1.69314432 | 3.57228685  |
| C | 6.78529686  | -3.76647352 | 3.63166074  |
| C | -2.94585780 | 0.53082090  | 2.92315468  |
| N | -1.56860255 | 0.97200250  | 2.96012606  |
| C | -1.09284579 | 2.25624936  | 2.90578051  |
| N | 0.18442412  | 2.34618062  | 2.95914709  |
| C | 0.60539595  | 1.03571540  | 3.05613224  |
| C | 1.87664282  | 0.44728261  | 3.14941256  |
| N | 3.00321560  | 1.15854586  | 3.15915708  |
| N | 1.93639967  | -0.88243051 | 3.23093908  |
| C | 0.80712675  | -1.58971666 | 3.22109699  |
| N | -0.42434630 | -1.15207401 | 3.13851370  |
| C | -0.46877131 | 0.17737302  | 3.05776406  |
| H | 3.62095417  | -1.91469804 | 3.36829373  |
| H | 8.31475723  | -1.10833218 | 2.66709714  |
| H | 9.03083193  | -2.37782171 | 3.65380886  |
| H | 8.23195707  | -1.00225404 | 4.40712659  |
| H | 7.65568211  | -4.39014342 | 3.71117777  |
| H | -1.76562096 | 3.08727662  | 2.82570760  |
| H | 2.95282486  | 2.14703307  | 3.09780378  |
| H | 3.88976883  | 0.70327693  | 3.22667919  |
| H | 0.94111648  | -2.65494072 | 3.29035383  |
| H | 3.60511864  | -4.92771775 | -2.59548154 |
| H | -3.66608222 | 2.56672210  | -2.41229123 |
| H | 5.11384682  | -5.17555514 | -3.47979627 |
| H | 3.60012081  | -4.90683039 | -4.34927480 |
| H | -3.66400397 | 2.46330477  | -4.16924325 |
| H | -3.82876339 | 4.03105064  | -3.38061067 |
| N | 4.44014991  | -3.21247127 | -3.45436394 |
| C | 5.70004294  | -2.71784452 | -3.45241541 |
| C | 3.34674224  | -2.34811545 | -3.44085955 |

|   |             |             |             |
|---|-------------|-------------|-------------|
| O | 2.23561934  | -2.83150616 | -3.44311022 |
| N | 3.57488021  | -1.01882102 | -3.42567070 |
| C | 4.79646009  | -0.53624002 | -3.42348374 |
| N | 4.95660612  | 0.77792292  | -3.40835453 |
| C | 5.94727761  | -1.40259980 | -3.43737473 |
| C | 4.17181045  | -4.64481366 | -3.47078410 |
| C | -3.35313570 | 3.06135393  | -3.32304744 |
| N | -1.92008354 | 3.24667596  | -3.33821247 |
| C | -1.22135292 | 4.43340129  | -3.32236928 |
| N | 0.04691574  | 4.28118846  | -3.33210883 |
| C | 0.22823037  | 2.91415292  | -3.35455185 |
| C | 1.41252335  | 2.11907794  | -3.37441833 |
| O | 2.57176834  | 2.46745710  | -3.37575389 |
| N | 1.10148363  | 0.75893954  | -3.39412185 |
| C | -0.15138958 | 0.22807865  | -3.39497299 |
| N | -0.22962716 | -1.10586426 | -3.41654673 |
| N | -1.23788289 | 0.94662154  | -3.37676666 |
| C | -0.98430075 | 2.26904823  | -3.35781417 |
| H | 6.49171291  | -3.44323249 | -3.46336044 |
| H | 4.15477187  | 1.38683963  | -3.39753385 |
| H | 5.86453822  | 1.17551056  | -3.40553223 |
| H | 6.94708191  | -1.01696513 | -3.43576164 |
| H | -1.73616326 | 5.37341461  | -3.30510461 |
| H | 1.89318242  | 0.13572862  | -3.40833405 |
| H | -1.13721232 | -1.50389383 | -3.41343092 |
| H | 0.57808891  | -1.69664897 | -3.42524822 |

Model D (NORIND\_R270)

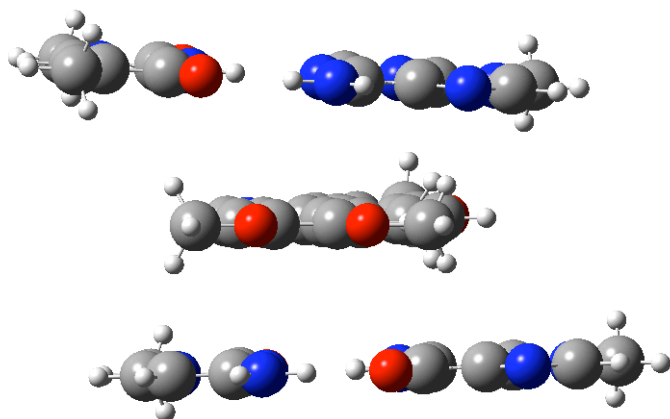

| Element | X           | Y           | Z           |
|---------|-------------|-------------|-------------|
| C       | 0.00000000  | 0.00000000  | 0.00000000  |
| C       | 1.42585310  | 0.00000000  | 0.00000000  |
| C       | 2.10745469  | 1.22726530  | 0.00000000  |
| C       | 1.36322937  | 2.44448399  | -0.00018611 |
| C       | 0.01114868  | 2.43011260  | -0.00036225 |
| C       | -0.68966535 | 1.16806725  | -0.00026547 |
| C       | 3.52138916  | 1.21780043  | 0.00014952  |
| N       | 4.25120675  | 0.14277737  | 0.00015558  |
| C       | 3.58929035  | -1.02313955 | 0.00000780  |
| C       | 2.22458666  | -1.15677221 | 0.00016873  |
| C       | 1.84248448  | -2.61825285 | 0.00022484  |
| C       | 3.19515378  | -3.30225777 | -0.00015368 |
| C       | 4.20936858  | -2.35513324 | -0.00051657 |
| C       | 5.56262229  | -2.70596076 | 0.00124230  |
| C       | 5.81436781  | -4.04837572 | 0.00414130  |
| C       | 4.80543611  | -4.99823503 | 0.00506088  |



|   |             |             |             |
|---|-------------|-------------|-------------|
| C | 3.47673739  | -4.66848096 | 0.00265979  |
| O | 5.36393295  | -6.23637948 | -0.00872523 |
| C | 6.74571204  | -6.04988120 | 0.18681436  |
| O | 7.01638035  | -4.68506936 | -0.01220721 |
| O | -2.02186246 | 1.27824563  | -0.00035999 |
| C | -2.81230967 | 0.12255291  | -0.00059727 |
| O | -0.78744076 | 3.50974944  | -0.00054547 |
| C | -0.21072456 | 4.78378298  | -0.00177816 |
| H | -0.51661817 | -0.93922779 | 0.00003645  |
| H | 1.90272620  | 3.37226035  | -0.00018294 |
| H | 4.04678790  | 2.15977620  | 0.00014976  |
| H | 1.25664169  | -2.88765521 | -0.87585116 |
| H | 1.25696117  | -2.88740898 | 0.87658034  |
| H | 6.34297893  | -1.96945024 | -0.00157984 |
| H | 2.71146666  | -5.42273263 | 0.00115562  |
| H | 7.29622554  | -6.63890862 | -0.53140043 |
| H | 7.01051353  | -6.33178751 | 1.20106756  |
| H | -3.83770706 | 0.46059830  | -0.00078766 |
| H | -2.63295618 | -0.47852550 | 0.88514486  |
| H | -2.63253622 | -0.47854477 | -0.88628723 |
| H | -1.03062357 | 5.48639111  | -0.00229662 |
| H | 0.39721072  | 4.94265958  | -0.88750367 |
| H | 0.39742460  | 4.94442633  | 0.88361156  |
| H | 8.43218966  | 1.92488552  | 4.50204779  |
| H | 2.23322474  | -6.25120831 | 3.92338605  |
| H | 8.50706038  | 3.47868996  | 3.66965061  |
| H | 8.52805570  | 1.97329015  | 2.75003067  |
| H | 2.32635581  | -6.19900367 | 2.16641673  |
| H | 0.81791170  | -6.66145421 | 2.95435332  |
| C | 8.12344484  | 2.46970036  | 3.62081701  |
| N | 6.66962262  | 2.52654404  | 3.54253199  |
| C | 5.99914576  | 1.33060644  | 3.46872545  |
| O | 6.57211935  | 0.27716118  | 3.46742804  |
| N | 4.63788628  | 1.43120120  | 3.39739342  |
| C | 3.89214983  | 2.58293066  | 3.39294132  |
| O | 2.68917344  | 2.54308490  | 3.32606603  |
| C | 4.66154589  | 3.82609621  | 3.47389224  |
| C | 3.91415585  | 5.12955007  | 3.47421427  |
| C | 5.98779281  | 3.72175167  | 3.54299714  |
| C | 1.68574720  | -6.01922100 | 3.01952809  |
| N | 1.24484633  | -4.64149191 | 3.03710987  |
| C | -0.03971306 | -4.16650978 | 2.98337856  |
| N | -0.12926750 | -2.88853339 | 3.01670086  |
| C | 1.18180633  | -2.46621888 | 3.09842209  |
| C | 1.77085923  | -1.19370741 | 3.16737291  |
| N | 1.05970064  | -0.06703300 | 3.16352061  |
| N | 3.10107216  | -1.13281280 | 3.23934404  |
| C | 3.80825302  | -2.26218807 | 3.24316802  |
| N | 3.37005710  | -3.49477756 | 3.18329782  |
| C | 2.04011563  | -3.54032982 | 3.11185426  |
| H | 4.13428037  | 0.55379533  | 3.34288859  |
| H | 3.32350821  | 5.23572903  | 2.57098506  |
| H | 4.59936526  | 5.96752849  | 3.53774510  |
| H | 3.22867671  | 5.18113528  | 4.31277650  |
| H | 6.61198382  | 4.59323087  | 3.60437446  |
| H | -0.87125582 | -4.84038327 | 2.91953832  |
| H | 0.07083692  | -0.11828082 | 3.10936708  |
| H | 1.51541703  | 0.82043625  | 3.21378554  |
| H | 4.87390501  | -2.12723442 | 3.30337946  |
| H | 7.10869105  | 0.44098565  | -2.63919374 |
| H | -0.38455661 | -6.82520756 | -2.29035210 |
| H | 7.35084267  | 1.93516164  | -3.54941204 |

|   |             |             |             |
|---|-------------|-------------|-------------|
| H | 7.07646870  | 0.40758624  | -4.39250439 |
| H | -0.29247838 | -6.85150092 | -4.04773940 |
| H | -1.85508999 | -7.00329900 | -3.24647677 |
| N | 5.38794855  | 1.26221605  | -3.50038627 |
| C | 4.89337396  | 2.52203863  | -3.51564789 |
| C | 4.52367270  | 0.16928107  | -3.46358873 |
| O | 5.00701298  | -0.94179435 | -3.45096619 |
| N | 3.19450950  | 0.39780511  | -3.44350727 |
| C | 2.71198106  | 1.61932188  | -3.45798779 |
| N | 1.39794707  | 1.77986000  | -3.43696249 |
| C | 3.57825966  | 2.76965266  | -3.49611467 |
| C | 6.82014867  | 0.99346267  | -3.52171362 |
| C | -0.88504744 | -6.52693851 | -3.20283090 |
| N | -1.07042914 | -5.09429406 | -3.23992894 |
| C | -2.25701079 | -4.39524673 | -3.22771028 |
| N | -2.10483360 | -3.12732000 | -3.25890147 |
| C | -0.73796699 | -2.94656635 | -3.29308701 |
| C | 0.05699161  | -1.76285016 | -3.33719551 |
| O | -0.29136114 | -0.60373312 | -3.35499470 |
| N | 1.41696711  | -2.07434163 | -3.36065039 |
| C | 1.94778144  | -3.32713336 | -3.34470358 |
| N | 3.28155550  | -3.40587984 | -3.37361706 |
| N | 1.22934497  | -4.41309922 | -3.30432730 |
| C | -0.09292583 | -4.15907480 | -3.28093922 |
| H | 5.61869441  | 3.31333472  | -3.54410126 |
| H | 0.78909441  | 0.97838406  | -3.40922148 |
| H | 1.00040704  | 2.68776956  | -3.44627694 |
| H | 3.19266667  | 3.76940126  | -3.50820341 |
| H | -3.19690547 | -4.90959093 | -3.19607425 |
| H | 2.04009231  | -1.28305520 | -3.39165984 |
| H | 3.67957515  | -4.31334746 | -3.35842025 |
| H | 3.87229111  | -2.59848512 | -3.39916597 |

### Model E (NORIND\_FLIP)

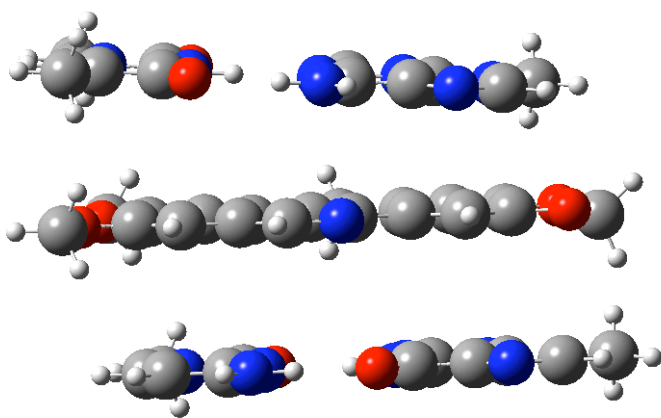

| Element | X           | Y          | Z           |
|---------|-------------|------------|-------------|
| C       | 0.00000000  | 0.00000000 | 0.00000000  |
| C       | 1.42585310  | 0.00000000 | 0.00000000  |
| C       | 2.10745469  | 1.22726530 | 0.00000000  |
| C       | 1.36322937  | 2.44448399 | -0.00018611 |
| C       | 0.01114868  | 2.43011260 | -0.00036225 |
| C       | -0.68966535 | 1.16806725 | -0.00026547 |
| C       | 3.52138916  | 1.21780043 | 0.00014952  |
| N       | 4.25120675  | 0.14277737 | 0.00015558  |

|   |             |             |             |
|---|-------------|-------------|-------------|
| C | 3.58929035  | -1.02313955 | 0.00000780  |
| C | 2.22458666  | -1.15677221 | 0.00016873  |
| C | 1.84248448  | -2.61825285 | 0.00022484  |
| C | 3.19515378  | -3.30225777 | -0.00015368 |
| C | 4.20936858  | -2.35513324 | -0.00051657 |
| C | 5.56262229  | -2.70596076 | 0.00124230  |
| C | 5.81436781  | -4.04837572 | 0.00414130  |
| C | 4.80543611  | -4.99823503 | 0.00506088  |
| C | 3.47673739  | -4.66848096 | 0.00265979  |
| O | 5.36393295  | -6.23637948 | -0.00872523 |
| C | 6.74571204  | -6.04988120 | 0.18681436  |
| O | 7.01638035  | -4.68506936 | -0.01220721 |
| O | -2.02186246 | 1.27824563  | -0.00035999 |
| C | -2.81230967 | 0.12255291  | -0.00059727 |
| O | -0.78744076 | 3.50974944  | -0.00054547 |
| C | -0.21072456 | 4.78378298  | -0.00177816 |
| H | -0.51661817 | -0.93922779 | 0.00003645  |
| H | 1.90272620  | 3.37226035  | -0.00018294 |
| H | 4.04678790  | 2.15977620  | 0.00014976  |
| H | 1.25664169  | -2.88765521 | -0.87585116 |
| H | 1.25696117  | -2.88740898 | 0.87658034  |
| H | 6.34297893  | -1.96945024 | -0.00157984 |
| H | 2.71146666  | -5.42273263 | 0.00115562  |
| H | 7.29622554  | -6.63890862 | -0.53140043 |
| H | 7.01051353  | -6.33178751 | 1.20106756  |
| H | -3.83770706 | 0.46059830  | -0.00078766 |
| H | -2.63295618 | -0.47852550 | 0.88514486  |
| H | -2.63253622 | -0.47854477 | -0.88628723 |
| H | -1.03062357 | 5.48639111  | -0.00229662 |
| H | 0.39721072  | 4.94265958  | -0.88750367 |
| H | 0.39742460  | 4.94442633  | 0.88361156  |
| H | -3.56136559 | -0.27142466 | -4.51500279 |
| H | 5.03193277  | -5.85777139 | -3.76920679 |
| H | -4.15994939 | 1.18502539  | -3.71923297 |
| H | -3.67514360 | -0.21687293 | -2.76423840 |
| H | 4.91943549  | -5.79866054 | -2.01359004 |
| H | 6.49865474  | -5.74302008 | -2.79658357 |
| C | -3.45835393 | 0.36629580  | -3.64816054 |
| N | -2.10945855 | 0.91256184  | -3.57721388 |
| C | -1.07482816 | 0.01537854  | -3.47793922 |
| O | -1.25841633 | -1.16932764 | -3.44940904 |
| N | 0.17219706  | 0.57139180  | -3.41459649 |
| C | 0.48518610  | 1.90705455  | -3.44040981 |
| O | 1.63066966  | 2.27736375  | -3.37755545 |
| C | -0.65847078 | 2.81510570  | -3.54753573 |
| C | -0.39514026 | 4.29398127  | -3.58171184 |
| C | -1.87128330 | 2.26743973  | -3.60870727 |
| C | 5.46520055  | -5.43328983 | -2.87332542 |
| N | 5.41503822  | -3.98842566 | -2.92520384 |
| C | 6.46351887  | -3.10644539 | -2.88796065 |
| N | 6.11640034  | -1.87445929 | -2.95178088 |
| C | 4.74007763  | -1.92172833 | -3.03805920 |
| C | 3.75621043  | -0.92487770 | -3.13458448 |
| N | 4.04511710  | 0.37551925  | -3.16022293 |
| N | 2.48387769  | -1.31846319 | -3.20251317 |
| C | 2.19962697  | -2.62005768 | -3.17679904 |
| N | 3.02805615  | -3.63049883 | -3.08967431 |
| C | 4.29495472  | -3.22258083 | -3.02263378 |
| H | 0.94227688  | -0.08286974 | -3.34145505 |
| H | 0.12124178  | 4.61467415  | -2.68367660 |
| H | -1.32280359 | 4.84960564  | -3.66219938 |
| H | 0.23609397  | 4.55419084  | -4.42406784 |

|   |             |             |             |
|---|-------------|-------------|-------------|
| H | -2.75283443 | 2.87524279  | -3.68808380 |
| H | 7.47350226  | -3.45823486 | -2.81165782 |
| H | 4.99296990  | 0.66249463  | -3.10893368 |
| H | 3.31669793  | 1.0552452   | -3.22953386 |
| H | 1.15125606  | -2.85434162 | -3.23580354 |
| H | -1.84387632 | -1.05214674 | 2.65379360  |
| H | 7.66425696  | -5.36736325 | 2.44554706  |
| H | -2.58009780 | 0.29354525  | 3.52945772  |
| H | -1.80947254 | -1.03128599 | 4.40725682  |
| H | 7.57925624  | -5.38175091 | 4.20342866  |
| H | 9.10461395  | -5.01582026 | 3.39956416  |
| N | -0.50507813 | 0.32200353  | 3.48827376  |
| C | -0.46504103 | 1.67482049  | 3.47174601  |
| C | 0.67763815  | -0.41542772 | 3.47374726  |
| O | 0.59793530  | -1.62442302 | 3.48935425  |
| N | 1.85162890  | 0.24796517  | 3.44281337  |
| C | 1.89326594  | 1.56065154  | 3.42645890  |
| N | 3.07597779  | 2.15494097  | 3.39624922  |
| C | 0.68927758  | 2.35144527  | 3.44096709  |
| C | -1.76247292 | -0.41400799 | 3.52182662  |
| C | 8.03088095  | -4.89617611 | 3.34867639  |
| N | 7.72144256  | -3.48463292 | 3.35121539  |
| C | 8.60230951  | -2.42645574 | 3.31764513  |
| N | 8.03078956  | -1.28403273 | 3.31954875  |
| C | 6.68304678  | -1.57470870 | 3.35506992  |
| C | 5.53489110  | -0.72827539 | 3.37451058  |
| O | 5.47129371  | 0.48046518  | 3.36353851  |
| N | 4.35990052  | -1.48006288 | 3.41088510  |
| C | 4.28338022  | -2.83851820 | 3.42666692  |
| N | 3.05443580  | -3.36232432 | 3.46290186  |
| N | 5.32648558  | -3.61872393 | 3.40896603  |
| C | 6.48539182  | -2.93374151 | 3.37416831  |
| H | -1.41507309 | 2.17514606  | 3.48448354  |
| H | 3.91981901  | 1.60572430  | 3.38494279  |
| H | 3.14354004  | 3.14371320  | 3.38248573  |
| H | 0.71457090  | 3.42266594  | 3.42785724  |
| H | 9.66080104  | -2.59379706 | 3.29429209  |
| H | 3.50605318  | -0.94517630 | 3.42578055  |
| H | 2.98629621  | -4.35098178 | 3.47074440  |
| H | 2.22565815  | -2.80147183 | 3.47182554  |

Model F (NORIND\_FLIP\_R180)

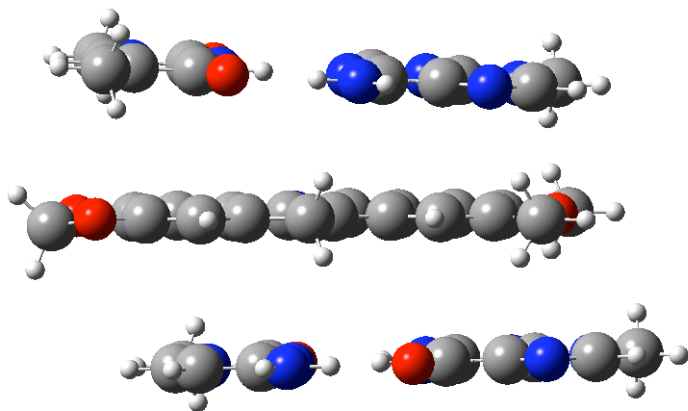

Element

X

Y

Z

|   |             |             |             |
|---|-------------|-------------|-------------|
| C | 0.00000000  | 0.00000000  | 0.00000000  |
| C | 1.42585310  | 0.00000000  | 0.00000000  |
| C | 2.10745469  | 1.22726530  | 0.00000000  |
| C | 1.36322937  | 2.44448399  | -0.00018611 |
| C | 0.01114868  | 2.43011260  | -0.00036225 |
| C | -0.68966535 | 1.16806725  | -0.00026547 |
| C | 3.52138916  | 1.21780043  | 0.00014952  |
| N | 4.25120675  | 0.14277737  | 0.00015558  |
| C | 3.58929035  | -1.02313955 | 0.00000780  |
| C | 2.22458666  | -1.15677221 | 0.00016873  |
| C | 1.84248448  | -2.61825285 | 0.00022484  |
| C | 3.19515378  | -3.30225777 | -0.00015368 |
| C | 4.20936858  | -2.35513324 | -0.00051657 |
| C | 5.56262229  | -2.70596076 | 0.00124230  |
| C | 5.81436781  | -4.04837572 | 0.00414130  |
| C | 4.80543611  | -4.99823503 | 0.00506088  |
| C | 3.47673739  | -4.66848096 | 0.00265979  |
| O | 5.36393295  | -6.23637948 | -0.00872523 |
| C | 6.74571204  | -6.04988120 | 0.18681436  |
| O | 7.01638035  | -4.68506936 | -0.01220721 |
| O | -2.02186246 | 1.27824563  | -0.00035999 |
| C | -2.81230967 | 0.12255291  | -0.00059727 |
| O | -0.78744076 | 3.50974944  | -0.00054547 |
| C | -0.21072456 | 4.78378298  | -0.00177816 |
| H | -0.51661817 | -0.93922779 | 0.00003645  |
| H | 1.90272620  | 3.37226035  | -0.00018294 |
| H | 4.04678790  | 2.15977620  | 0.00014976  |
| H | 1.25664169  | -2.88765521 | -0.87585116 |
| H | 1.25696117  | -2.88740898 | 0.87658034  |
| H | 6.34297893  | -1.96945024 | -0.00157984 |
| H | 2.71146666  | -5.42273263 | 0.00115562  |
| H | 7.29622554  | -6.63890862 | -0.53140043 |
| H | 7.01051353  | -6.33178751 | 1.20106756  |
| H | -3.83770706 | 0.46059830  | -0.00078766 |
| H | -2.63295618 | -0.47852550 | 0.88514486  |
| H | -2.63253622 | -0.47854477 | -0.88628723 |
| H | -1.03062357 | 5.48639111  | -0.00229662 |
| H | 0.39721072  | 4.94265958  | -0.88750367 |
| H | 0.39742460  | 4.94442633  | 0.88361156  |
| H | 8.92411732  | -0.75358086 | -4.44898223 |
| H | 0.32458035  | 4.84728843  | -3.91310458 |
| H | 9.51478453  | -2.19158820 | -3.61468848 |
| H | 9.02088246  | -0.76849489 | -2.69640945 |
| H | 0.42002270  | 4.82791738  | -2.15559057 |
| H | -1.15152707 | 4.75440554  | -2.95241899 |
| C | 8.81262234  | -1.37153691 | -3.56897460 |
| N | 7.46304132  | -1.91620548 | -3.49878909 |
| C | 6.42759469  | -1.01711892 | -3.42989061 |
| O | 6.61102789  | 0.16794957  | -3.42639041 |
| N | 5.17995181  | -1.57169312 | -3.36609695 |
| C | 4.86708079  | -2.90763222 | -3.36472230 |
| O | 3.72100001  | -3.27654985 | -3.30463238 |
| C | 6.01162382  | -3.81774956 | -3.44016503 |
| C | 5.74847439  | -5.29704861 | -3.44342819 |
| C | 7.22503362  | -3.27147514 | -3.50193154 |
| C | -0.11741045 | 4.44313263  | -3.01209890 |
| N | -0.06690481 | 2.99747020  | -3.03079163 |
| C | -1.11579401 | 2.11644239  | -2.98378764 |
| N | -0.76820695 | 0.88336620  | -3.01635111 |
| C | 0.60889363  | 0.92882334  | -3.09031147 |
| C | 1.59354254  | -0.06984711 | -3.15470745 |
| N | 1.30475622  | -1.37052313 | -3.15372763 |

|   |             |             |             |
|---|-------------|-------------|-------------|
| N | 2.86651777  | 0.32224147  | -3.21916698 |
| C | 3.15064776  | 1.62411592  | -3.22014341 |
| N | 2.32152228  | 2.63617793  | -3.16394361 |
| C | 1.05398802  | 2.22974101  | -3.09999501 |
| H | 4.40927024  | -0.91602847 | -3.31525861 |
| H | 5.22336059  | -5.59739771 | -2.54342401 |
| H | 6.67681427  | -5.85425031 | -3.50231181 |
| H | 5.12542125  | -5.57631903 | -4.28577142 |
| H | 8.10724692  | -3.88082208 | -3.55897172 |
| H | -2.12643208 | 2.46975643  | -2.92527016 |
| H | 0.35641881  | -1.65636947 | -3.10516405 |
| H | 2.03373959  | -2.05184187 | -3.20056442 |
| H | 4.19956768  | 1.85712087  | -3.27425221 |
| H | 7.13726893  | 0.18900901  | 2.68320174  |
| H | -2.36800496 | 4.49729389  | 2.28530525  |
| H | 7.86471458  | -1.13650645 | 3.59629316  |
| H | 7.08589501  | 0.20786173  | 4.43627258  |
| H | -2.30007183 | 4.55145073  | 4.04315393  |
| H | -3.81759390 | 4.16726195  | 3.23300256  |
| N | 5.79018956  | -1.16611621 | 3.53561525  |
| C | 5.75016555  | -2.51896519 | 3.54931138  |
| C | 4.60775150  | -0.42933176 | 3.49292343  |
| O | 4.68743246  | 0.77971587  | 3.48194600  |
| N | 3.43404330  | -1.09338314 | 3.46560777  |
| C | 3.39242218  | -2.40610806 | 3.47855363  |
| N | 2.20999388  | -3.00105823 | 3.45031378  |
| C | 4.59612560  | -3.19623941 | 3.52264104  |
| C | 7.04728045  | -0.42939642 | 3.56471602  |
| C | -2.74343058 | 4.04661576  | 3.19526013  |
| N | -2.43418572 | 2.63552532  | 3.23273161  |
| C | -3.31480094 | 1.57676236  | 3.21455635  |
| N | -2.74345128 | 0.43473778  | 3.24784934  |
| C | -1.39608508 | 0.72629152  | 3.28986823  |
| C | -0.24826476 | -0.11935880 | 3.33959547  |
| O | -0.18469599 | -1.32803126 | 3.35658597  |
| N | 0.92639951  | 0.63318873  | 3.37035999  |
| C | 1.00291149  | 1.99166189  | 3.35615145  |
| N | 2.23150349  | 2.51628919  | 3.39245718  |
| N | -0.03988758 | 2.77115252  | 3.31068133  |
| C | -1.19847627 | 2.08543041  | 3.28013812  |
| H | 6.69997391  | -3.01877057 | 3.58259065  |
| H | 1.36636285  | -2.45233026 | 3.41839022  |
| H | 2.14245935  | -3.98989613 | 3.45826947  |
| H | 4.57084256  | -4.26748523 | 3.53352606  |
| H | -4.37299758 | 1.74341586  | 3.17714951  |
| H | 1.78000354  | 0.09887014  | 3.40563910  |
| H | 2.29967182  | 3.50487858  | 3.37859528  |
| H | 3.06009415  | 1.95587348  | 3.42211030  |

## REFERENCES

Complete list of authors for reference 25:

Frisch, M. J.; Trucks, G. W.; Schlegel, H. B.; Scuseria, G. E.; Robb, M. A.; Cheeseman, J. R.; Montgomery, Jr., J. A.; Vreven, T.; Kudin, K. N.; Burant, J. C.; Millam, J. M.; Iyengar, S. S.; Tomasi,

J.; Barone, V.; Mennucci, B.; Cossi, M.; Scalmani, G.; Rega, N.; Petersson, G. A.; Nakatsuji, H.; Hada, M.; Ehara, M.; Toyota, K.; Fukuda, R.; Hasegawa, J.; Ishida, M.; Nakajima, T.; Honda, Y.; Kitao, O.; Nakai, H.; Klene, M.; Li, X.; Knox, J. E.; Hratchian, H. P.; Cross, J. B.; Bakken, V.; Adamo, C.; Jaramillo, J.; Gomperts, R.; Stratmann, R. E.; Yazyev, O.; Austin, A. J.; Cammi, R.; Pomelli, C.; Ochterski, J. W.; Ayala, P. Y.; Morokuma, K.; Voth, G. A.; Salvador, P.; Dannenberg, J. J.; Zakrzewski, V. G.; Dapprich, S.; Daniels, A. D.; Strain, M. C.; Farkas, O.; Malick, D. K.; Rabuck, A. D.; Raghavachari, K.; Foresman, J. B.; Ortiz, J. V.; Cui, Q.; Baboul, A. G.; Clifford, S.; Cioslowski, J.; Stefanov, B. B.; Liu, G.; Liashenko, A.; Piskorz, P.; Komaromi, I.; Martin, R. L.; Fox, D. J.; Keith, T.; Al-Laham, M. A.; Peng, C. Y.; Nanayakkara, A.; Challacombe, M.; Gill, P. M. W.; Johnson, B.; Chen, W.; Wong, M. W.; Gonzalez, C.; and Pople, J. A. *Gaussian 03*, Revision C.02, ed.; Gaussian, Inc., Wallingford CT, 2004.
